# 1 Inferring the brain's internal model from sensory responses in a 2 probabilistic inference framework

3 Richard D. Lange & Ralf M. Haefner\*

Brain & Cognitive Sciences, University of Rochester, Rochester, NY 14627, USA

4 October 17, 2016

## 5 **Abstract**

6 During perception, the brain combines information received from its senses with prior information about  
7 the outside world (von Helmholtz, 1867). The mathematical concept of probabilistic inference has previ-  
8 ously been suggested as a framework for understanding both perception (Lee and Mumford, 2003; Knill and  
9 Pouget, 2004; Yuille and Kersten, 2006) and cognition (Gershman and Beck, 2016). Whether this framework  
10 can explain not only behavior but also the underlying neural computations has been an open question. We  
11 propose that sensory neurons' activity represents a central quantity of Bayesian computations: posterior  
12 beliefs about the outside world. As a result, sensory responses, just like the beliefs themselves, should de-  
13 pend both on sensory inputs and on prior information represented in other parts of the brain. We show  
14 that this dependence on internal variables induces variability in sensory responses that – in the context of  
15 a psychophysical task – is related both to the structure of that task and to the neurons' stimulus tuning.  
16 We derive analytical predictions for the correlation between different neurons' responses, and for their cor-  
17 relation with behavior. Furthermore, we show that key neurophysiological observations from much studied  
18 perceptual discrimination and detection experiments agree with those predictions. Our work thereby pro-  
19 vides a normative explanation for those observations, requiring a reinterpretation of the role of correlated  
20 variability for sensory coding. Finally, the fact that sensory responses (which we observe) are a product  
21 both of external inputs (which we control) and of internal beliefs, allows us to reverse-engineer information  
22 about the subject's internal beliefs by observing sensory neurons' responses alone. Population recordings of  
23 sensory neurons in animals performing a task can therefore be used to track changes in the internal beliefs  
24 with learning and attention.

---

\*ralf.haefner@gmail.com

## 25 Introduction

26 At any moment in time, the sensory information entering the brain is insufficient to give rise to our rich  
27 perception of the outside world (von Helmholtz, 1867). To compute those rich percepts from incomplete  
28 and noisy inputs, the brain has to employ prior experience about which causes are most likely responsi-  
29 ble for a given input. In the framework of Bayesian inference, our (posterior) beliefs of these causes are  
30 computed from a combination of (prior) expectations and incoming sensory information (likelihood). While  
31 there is increasing empirical evidence that behavior approximates optimal Bayesian inference in many sit-  
32 uations (Pouget et al., 2013; Ma and Jazayeri, 2014), it is unclear whether behavior is simply the result of  
33 task-specific heuristics or whether neural activity can also be described in a Bayesian framework. In the first  
34 part of this paper we demonstrate that sensory responses change with detection and discrimination tasks as  
35 if they do indeed represent posterior beliefs. In the second part we show how this observation can be used  
36 to infer the structure of the internal beliefs held by a particular subject about an incoming stimulus.

## 37 Results

38 We start by testing the hypothesis that sensory neurons encode *posterior* beliefs over latent variables in  
39 the brain’s internal model (Lee and Mumford, 2003; Hoyer and Hyvärinen, 2003; Fiser et al., 2010; Haefner  
40 et al., 2016). If they do then their responses will depend both on information from the sensory periphery  
41 (likelihood), and on relevant information in the rest of the brain (prior). In a hierarchical model, the former  
42 are communicated by feedforward connections from the periphery, and the latter are relayed by feedback  
43 connections from higher-level areas (Lee and Mumford, 2003) (Figure 1a).

44 We represent the directly observed variable – the sensory input – by  $\mathbf{E}$  while we call the variable repre-  
45 sented by the recorded neural population under consideration  $\mathbf{x}$ .  $\mathbf{I}$  is a high-dimensional vector representing  
46 all other internal variables in the brain that are probabilistically related to  $\mathbf{x}$ . For instance, when considering  
47 the responses of a population of V1 neurons,  $\mathbf{E}$  is the high-dimensional image projected onto the retina, and  
48  $\mathbf{x}$  has been hypothesized to represent the presence or absence of Gabor-like features at particular retinotopic  
49 locations (Bornschein et al., 2013) or the intensity of such features (Olshausen and Field, 1996; Schwartz  
50 and Simoncelli, 2001). In higher visual areas, on the other hand, variables are likely related to the identity  
51 of objects and faces (Kersten et al., 2004).  $\mathbf{I}$  represents these higher-level variables, as well as knowledge  
52 about the visual surround, task-related knowledge about the probability of upcoming stimuli, etc.

53 In this framework, measuring tuning curves corresponds to changing the external inputs  $\mathbf{E}$  along some  
54 experimenter-defined stimulus axis  $s$ , for example visual orientation or auditory frequency. If the variable  $\mathbf{x}$

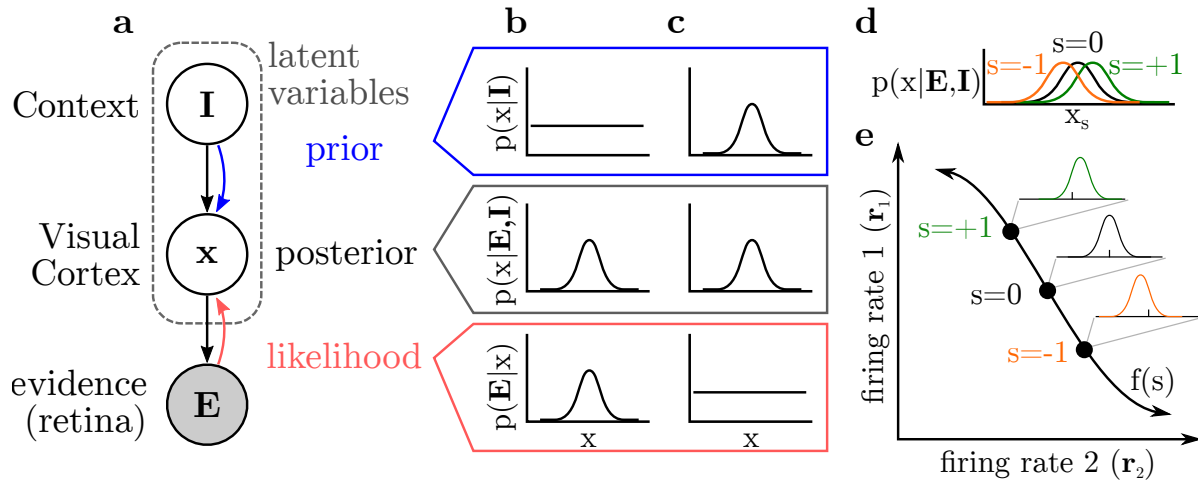

Figure 1: Illustration of ‘posterior coding’ for the visual system (also see Figure S1). **(a)** Neurons in visual cortex represent latent, unobserved variables in a hierarchical probabilistic model. Posterior beliefs about  $\mathbf{x}$  depend both on the image on the retina,  $\mathbf{E}$ , and relevant higher-level components of the internal model  $\mathbf{I}$ . Black arrows depict the implicit generative model, while red and blue arrows indicate the actual information flow necessary to perform inference over  $\mathbf{x}$  when  $\mathbf{E}$  is “observed” (Lee and Mumford, 2003). **(b-c)** Top (blue): prior, middle (gray): posterior, bottom (red): likelihood.  $\mathbf{x}$  may live in a high dimensional space, but only one dimension is illustrated here. In general, an informative likelihood and uninformative prior (b) can yield the same posterior as an informative prior and uninformative likelihood (c). Although we have illustrated the prior as flat in (b), in general it will not be, but will instead reflect the statistics of the natural world (e.g. differences in the occurrence of vertical and horizontal orientations). **(d)** In psychophysical tasks, the experimenter varies some parameter  $s$  to generate an image (e.g. changing the orientation of a grating pattern). This will cause changes to the distribution  $p(\mathbf{x})$  if  $\mathbf{x}$  depends on  $s$ .  $\mathbf{x}_s$  represents a projection of the  $\mathbf{x}$ -space along which the posterior over  $\mathbf{x}$  varies with  $s$ . **(e)** The “posterior coding” hypothesis: a neuron’s firing rate,  $r$ , depends on some statistics of the posterior distribution over  $\mathbf{x}$ . Tuning curves  $f(s)$  in this framework arise due to consistent changes in  $r$  as the posterior,  $p(\mathbf{x}|\mathbf{E}, \mathbf{I})$ , changes as a function of  $s$ .

55 represented by the recorded neurons depends on  $s$ , then the likelihood  $p(\mathbf{E}|\mathbf{x})$  will vary as  $s$  is varied. As  
56 a result, the posterior  $p(\mathbf{x})$  will vary (Figure 1d), and in turn so will the neural responses representing it.  
57 The dependence of the mean of those responses on  $s$  gives rise to tuning curves (Figure 1e). The very same  
58 posterior, however, can also arise as the result of no information about  $\mathbf{x}$  in the sensory evidence, but prior  
59 information about it in the rest of the brain encoded by  $p(\mathbf{x}|\mathbf{I})$  (Figure 1c), resulting in a dependence of  
60 sensory responses on internal variables even when the external stimulus is kept constant.

61 Training a subject on a particular psychophysical task, on the other hand, involves learning the sensory  
62 statistics defined by the task. Prior information relevant to the task, such as which stimuli are more likely  
63 to appear, will influence the posterior, especially when the visual input is uninformative (Figure 1a). If  
64 neural responses represent posterior beliefs, then they should be the same whether this belief is due to an  
65 informative stimulus on the screen (Figure 1b), or prior expectations about this stimulus in the rest of the  
66 brain (Figure 1c). Hence there is an “equivalence” between changes in the external world and changes in  
67 internal beliefs, and formalizing this equivalence for a particular experimental context allows us to make  
68 predictions for changes in neural responses due to changing internal beliefs.

69 To make this idea more concrete, consider a standard discrimination paradigm in which subjects make  
70 a categorical decision about a stimulus falling into one of two categories. Over time, the subject learns to  
71 expect a stimulus from one of two categories. Let us assume for the sake of exposition that the stimulus  
72 distribution across trials is bimodal, inducing a bimodal prior in the brain (Figure 2a-c). Many experiments  
73 contain a fraction of ‘zero-signal’ trials in which the stimulus is uninformative about the correct decision  
74 (Britten et al., 1996; Nienborg et al., 2012), that is the likelihood is symmetric with respect to the two  
75 categories. If both categories are equally likely *a priori*, then performing exact inference in these trials will  
76 yield a symmetric posterior (Figure 2a). However, inference in the brain is at best approximate, both in  
77 terms of computation and in terms of representation. On any one trial, the actual prior used by the brain  
78 deviates from the correct one, for example due to erroneously assumed serial dependencies between the trials  
79 (Fischer and Whitney, 2014) (Figure 2c). The likelihood also varies from trial to trial due to sensory noise,  
80 e.g. in photo receptors (Figure 2b). As a result, the posterior varies from trial-to-trial even in these zero-  
81 signal trials. Given our assumption that neural responses encode posteriors, this trial-by-trial variability in  
82 the brain’s posterior induces variability and covariability in the responses of sensory neurons representing  
83 that posterior. Having completely learned the task implies that the brain only expects stimuli that vary  
84 along the experimenter-defined  $s$ -dimension and, hence, any variability in internal beliefs, or sensory noise,  
85 will translate into variability in the posterior along the  $s$ -dimension (Figure 2d).

86 Now consider the firing responses of two neurons as the external stimulus is changed along the task-  
87 relevant axis. Their mean responses change along a line in  $r_1$ - $r_2$ -space as a result of the changing posterior

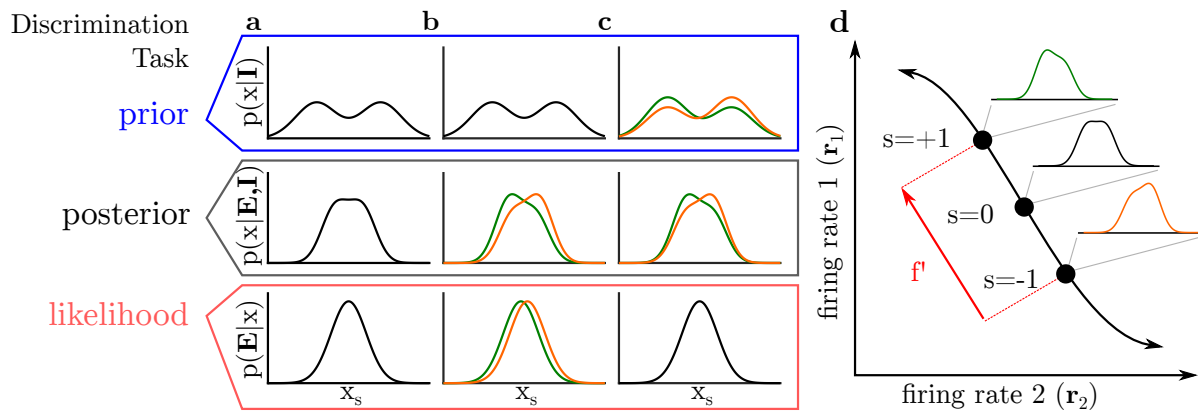

Figure 2: Posterior coding in a discrimination task. The  $x$ -axis in these plots illustrates a projection of the  $\mathbf{x}$ -space along which the posterior over  $\mathbf{x}$  varies with  $s$ ,  $\mathbf{x}_s$ . **(a-c)** as in Figure 1b-c. **(a)** The subject has learned to expect stimuli from either of the categories, increasing prior mass in  $\mathbf{x}$ -space along  $\mathbf{x}_s$ . “Zero-signal” trials in which the given stimulus contains no information about the correct category correspond to a likelihood with mass on either side of the decision boundary. Whether the prior is bimodal depends on the fraction of zero-signal and zero-signal trials in the experiment and is not important for our argument (see Figures S2 and S3). **(b)** Trial-by-trial changes in the likelihood, whether due to changes in the stimulus or due to noise in its representation, will shift mass in the posterior along the  $\mathbf{x}_s$  direction. **(c)** Unequal prior expectations about the upcoming category at the beginning of the trial (e.g. due to serial dependencies) will shift the posterior along  $\mathbf{x}_s$  similar to the changing likelihoods in (b). **(d)** Axes and  $f(s)$  as in Figure 1e, with the change in mean firing rates around the decision boundary ( $s = 0$ ) indicated by the derivative of the tuning curves,  $f'$ . The equivalence of posteriors in (b) and (c) implies that firing rates will move along  $f'$  regardless of whether the stimulus itself changed or beliefs about it changed. We assume that  $\mathbf{f}$  is measured during the task in order to account for the task-specific prior.

(Figure 2d). The dependence of the mean of the neural responses on the stimulus  $s$  is given by each neuron's tuning function,  $f_i(s)$ , as measured while the subject is performing the task (Figure 2d). For small changes – as are typical during threshold psychophysics – this can be linearly approximated as:  $f_i(s) \approx f_i(0) + sf'_i(0)$  where  $f'_i(0)$  is the derivative of neuron  $i$ 's tuning function, and where we have defined  $s$  to be zero for the stimulus at the decision boundary. As a result of the equivalence noted above, the change in mean responses (corresponding to changes in the posterior) lies along the same line in  $r_1$ - $r_2$ -space *regardless* of the particular combination of likelihood and prior giving rise to it. Under the assumption that the behavioral decision of the subject is based on the posterior belief represented by the neurons under consideration, the average posterior preceding choice 1 will have more mass favoring choice 1, and the average posterior preceding choice 2 will have more mass favoring choice 2, even if the average posterior across all trials is symmetric with respect to the decision boundary. Since the difference in the corresponding mean responses is proportional to the slope vector  $\mathbf{f}'(0)$ , we derive as a first prediction that  $\Delta_{\text{choice}} r_i \propto f'_i(0)$  where  $\Delta_{\text{choice}} r_i$  is the difference between neuron  $i$ 's mean response preceding choice 1 and the mean response preceding choice 2 (Methods). This prediction relates the dependence of a neuron's response on the external stimulus to the dependence of its response on the choice *given a fixed stimulus*. In fact, when dividing both sides of this proportionality by the standard deviation of the neuron's response,  $\sigma_i$ , one obtains a proportionality between choice probabilities and neural sensitivities (Britten et al., 1996; Nienborg et al., 2012; Haefner et al., 2013):  $CP_i \propto d'_i$  where  $d'_i = f'_i(0)/\sigma_i$  is the stimulus sensitivity of neuron  $i$  (measured as d-prime). Many empirical studies have found such a relationship (reviewed in (Nienborg et al., 2012)). Interestingly, the classic feedforward-only framework makes the same prediction when the decoding weights are linear optimal (Haefner et al., 2013). Therefore, this prediction alone cannot distinguish between the classic feedforward framework and the probabilistic inference framework.

However, our probabilistic inference framework goes beyond the classic feedforward model and also predicts a component of response (co)variance that is due to the shape of the prior and trial-to-trial fluctuations in internal beliefs. Since the prior learned in the task concentrates its mass along the task-relevant axis (where all the stimuli are shown), fluctuations in the subject's internal beliefs about the stimulus will lie along that axis. As a result, these fluctuations induce the same covariance between the sensory responses as fluctuations in the stimulus itself. Using the linear approximation from above, the covariability of the responses of two neurons  $i$  and  $j$  can be expressed as  $\text{cov}(r_i, r_j) = C_{ij}^0 + f'_i f'_j \text{var}(s_{\mathbf{I}})$ . Here,  $C_{ij}^0$  is the intrinsic covariability of the neural responses in the absence of task-related variability in feedforward or feedback inputs (Methods).  $s_{\mathbf{I}}$  denotes the difference between the internal estimate of  $s$  and the externally presented  $s$  due to prior expectations about it and fluctuates from trial to trial. Dividing both sides by the response variability, we obtain the prediction that task-dependent noise correlations are proportional to the product

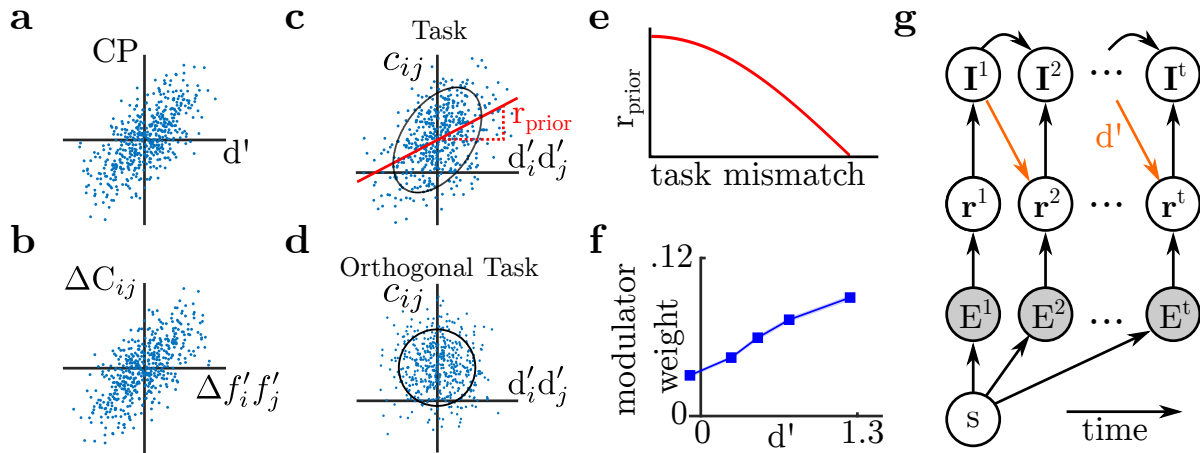

Figure 3: Predictions of the probabilistic inference framework. **(a)** first prediction, in agreement with classical feedforward encoding-decoding models with optimal linear readout: neurons’ choice probabilities should be proportional to their sensitivity to the stimulus  $d'$ . **(b)** second prediction, requiring top-down signals: the difference in covariance structure between comparable tasks should be proportional to the difference in the product of tuning curve derivatives for each task. By subtracting out intrinsic covariability, this is a less noise-prone prediction than (c-e). **(c)** correlations induced by the prior should be proportional to  $d'd'$ . The strength of the prior should modulate the slope  $r_{\text{prior}}$  of this relationship. **(d)** the relationship in (c) should not hold for neural sensitivities  $d'$  measured with respect to other tasks’  $d'$  vectors. **(e)** summary of (c) and (d):  $r_{\text{prior}}$  should fall off with the “mismatch” between the task direction  $d'$  and the regressor direction. **(f)** Rabinowitz et al. (2015) results replotted, where it was found that the strength of top-down ‘modulator’ connections is linearly related to  $d'$ . **(g)** Emergence of differential correlations (Moreno-Bote et al., 2014) over the course of a trial. Here, arrows show information flow. The signal  $s$  is embedded in a sequence of noisy stimulus frames presented throughout the trial (Nienborg and Cumming, 2014; Bondy and Cumming, 2013). The developing posterior belief about the correct choice acts as a prior on subsequent responses within the same trial, inducing differential correlations. As a result, neural responses at any point throughout the trial will contain information not just about the current sensory input, but also stimuli presented earlier during the trial.

121 of the neural sensitivities:  $c_{ij} \propto d'_i d'_j$ . This predicted proportionality has two direct implications: first,  
122 performing a task should most change the noise correlation between neurons that are the most informative  
123 for this specific task, i.e. for whom  $d'$  is the largest (positive or negative). Second, this change should be  
124 positive for neurons with the same task-specific selectivity, i.e. should both increase or both decrease their  
125 activity in response to a stimulus predictive of a particular choice.

126 Existing studies have used two primary strategies to isolate this type of extra-sensory response modulation  
127 experimentally. First, one could take advantage of the fact that  $d'$  is defined with respect to a particular  
128 task and *vary the task* a subject is performing, predictably altering their internal model. In such studies,  
129 the difference in neural responses to zero-signal stimuli will isolate the task-dependent component for which  
130 we make predictions. At least two studies have used this approach (Bondy and Cumming, 2013; Cohen and  
131 Newsome, 2008), and found changes in the correlation structure consistent with our predictions (discussed  
132 in (Haefner et al., 2016), Methods). The second experimental approach one could take is to *statistically*  
133 isolate the top-down component of neural variability within a single task. A recent study (Rabinowitz et al.,  
134 2015) inferred the main axis along which the responses of V4 neurons varied from trial to trial in a change-  
135 detection task (Cohen and Newsome, 2009), having accounted for feedforward sources of variability. The  
136 study found that the most important modulator affecting a neuron's response is proportional to its  $d'_i$  (Figure  
137 3b), implying correlated variability in proportion to  $d'_i d'_j$ . Importantly, the predicted noise correlations are  
138 task-context-specific and therefore likely depend on top-down signals. For the same reason, our prediction  
139 is different from the often observed relationship between noise correlation and tuning curve/receptive field  
140 overlap (which are task-*independent*) (Kanitscheider et al., 2015).

141 In addition to making empirically testable predictions for the influence of top-down signals on neural  
142 responses, the probabilistic inference framework provides a normative explanation for their existence. While  
143 in the classic feedforward framework decision-related signals contaminate the sensory evidence and decrease  
144 behavioral performance (Wimmer et al., 2015), here they serve the function of communicating to a sensory  
145 neuron knowledge derived from stimuli at earlier points in time, or any other relevant information from the  
146 brain's complex internal model. Consider the case of a dynamic stimulus in which the noise obscuring the  
147 fixed signal is dynamically redrawn over the course of the trial. In that case the brain's posterior belief about  
148 the signal should integrate information over all stimulus frames presented up to that moment. At any point in  
149 time, this belief over the correct choice acts as a prior that is to be combined with the likelihood representing  
150 the next stimulus frame. Communicating that prior to sensory neurons allows them to take the information  
151 provided by previous stimulus frames into account and not just rely on the current inputs (Figure 3f).  
152 Interestingly, the  $d' d'$ -correlations induced through top-down signals in the probabilistic inference framework  
153 have the same shape as the information-limiting correlations previously described (Moreno-Bote et al., 2014).



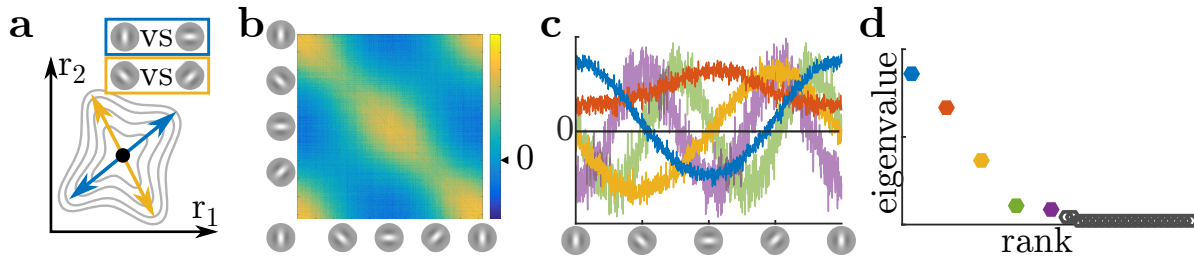

Figure 4: **(a)** Trial-to-trial fluctuations in the posterior beliefs about  $\mathbf{x}$  imply trial-by-trial variability in the mean responses representing that posterior. **(b)** Correlation structure of simulated sensory responses during discrimination task. Neurons are sorted by their preferred orientation (based on (Haefner et al., 2016)). **(c)** Eigenvectors of correlation matrix (principal components) plotted as a function of neurons' preferred orientation. The blue vector corresponds to fluctuations in the belief that either a vertical or horizontal grating is present (task 1), and the yellow corresponds to fluctuations in the belief that an obliquely-oriented grating is present (task 2). See Methods for other colors. **(d)** Eigenspectrum of the correlation matrix showing five dominant subspace dimensions in responses corresponding to the five plotted eigenvectors, above.

154 However, unlike in the feedforward case where these correlations limit information (Moreno-Bote et al., 2014),  
155 here they are induced through feedback signals that may contain prior information about the stimulus, e.g.  
156 from earlier times in the trial (Figure 3f), or due to the subject's internal beliefs going into the trial. In  
157 general, differential correlations limit information only when they are induced by variability unrelated to the  
158 stimulus (i.e. actual noise), and not if they are induced by prior knowledge about the stimulus, e.g. due to  
159 temporal dependencies within a trial.

## 160 Reverse-engineering the internal model

161 From our analysis follows that variability in internal beliefs will induce correlated variability in the sensory  
162 responses of neurons related to these beliefs. Conversely, this means that the statistical structure in sensory  
163 responses can be used to infer properties of these beliefs. Importantly, this applies not just to the task-induced  
164 prior but also to priors corresponding to natural input statistics concentrated their mass in a low-dimensional  
165 subspace of  $\mathbf{x}$  (Olshausen and Field, 2004). As a result, trial-by-trial variability in internal beliefs will lie  
166 within this subspace, and variability in the feedforward inputs will induce posterior variability that is larger  
167 within that subspace than in directions outside it. Hence, inferring the directions of largest variability  
168 in sensory responses can yield information about the structure of the brain's prior on  $\mathbf{x}$ , in particular its  
169 task-related component.

170 The task structure of a simple discrimination task as discussed above determines the only task-relevant be-  
171 lief (which of two target stimuli is the better explanation for the external inputs). However, more complicated  
172 tasks may involve inference over more than one binary variable, and therefore more than one task-relevant

173 belief. For instance, a task in which the target stimuli can vary from trial to trial involves inference both  
174 over the correct task and over the correct choice. Even if a pre-trial cue indicates the correct task, the  
175 cue may not be completely reliable, or the subject may not be completely certain about the cue (Cohen  
176 and Newsome, 2008; Sasaki and Uka, 2009). This uncertainty may be about the task parameters (e.g. the  
177 specific target orientation, or spatial frequency), or due to confusion with a previously learned task. If those  
178 task-related uncertainties are sufficiently large, trial-by-trial variability in the associated beliefs will lead  
179 to measurable changes in the statistical structure of sensory responses, as well as a decrease in behavioral  
180 performance. Importantly, since we know how the neural responses depend on the stimulus, we can gain an  
181 intuitive understanding of these statistical structures in terms of the stimulus.

182 In order to demonstrate the usefulness of this approach, we used it to infer the structure of an existing  
183 neural-sampling-based probabilistic inference model for which the ground truth is known (Haefner et al.,  
184 2016). In the simulated task, subjects had to perform a coarse orientation discrimination task either between  
185 a vertical and a horizontal grating (cardinal context), or between a  $-45\text{deg}$  and  $+45\text{deg}$  grating (oblique  
186 context) (Figure 4b). The subject was cued to the correct context before each trial. In the model we assumed  
187 a remaining uncertainty about the correct task context corresponding to an 80% – 20% prior. The model  
188 simulates the responses of a population of primary visual cortex neurons with oriented receptive fields. Since  
189 the relevant stimulus dimension for this task is orientation, we sorted the neurons by preferred orientation.  
190 The resulting noise correlation matrix (Haefner et al., 2016) – computed for *zero-signal trials* – has a  
191 characteristic structure in agreement with empirical observations (Figure 4c)(Bondy and Cumming, 2013).  
192 The correlation matrix has five significant eigenvalues (Figure 4d) corresponding to five eigenvectors (Figure  
193 4c). Each of these eigenvectors represents one direction in which the neural responses vary from trial-to-trial.  
194 Knowing the stimulus selectivity of each neuron, i.e. how the response of each neuron depends on variables  
195 in the external world, allows us to interpret this eigenvector in terms of variables in the external world. For  
196 instance, the elements of the eigenvector associated with the largest eigenvalue in our simulation (blue in  
197 Figure 4c) are largest for neurons with vertically oriented receptive fields, and negative for those neurons  
198 with preferred horizontal orientation. The means that on any one trial, the population response indicates  
199 the presence of a vertical orientation in the stimulus and not a horizontal orientation, or vice versa. Recall  
200 that the presented stimulus was fixed, i.e. that this variability is due to variability in the internal beliefs,  
201 not the external stimulus. Finding such an eigenvector in empirical data therefore indicates that there is  
202 trial-to-trial variability in the subject’s internal belief (represented by the rest of the brain and communicated  
203 as a prior on the sensory responses) about whether “there is a vertical grating and not a horizontal grating”  
204 or vice versa in the stimulus. Knowing the stimulus-dependence of the neurons’ responses allows us to  
205 interpret the abstract statistical structure in neural covariability in terms of the stimulus space defined by

206 the experimenter. Equally, one can interpret the eigenvector corresponding to the third-biggest eigenvalue  
207 (yellow in Figure 4c-d) as corresponding to the belief that a +45-degree grating is being presented, but not  
208 a -45-deg grating, or vice versa. This is the correct axis for the wrong (oblique) context, indicating that  
209 the subject maintained some uncertainty about which is the correct task context across trials. Maintaining  
210 this uncertainty is the optimal strategy from the subject's perspective given their imperfect knowledge of the  
211 world. However, when compared to certain (perfect knowledge), it decreases behavioral performance on the  
212 actual task defined by the experimenter. In the probabilistic inference framework, behavioral performance  
213 is optimal when the internal model learned by the subject exactly corresponds to the experimenter-defined  
214 one. An empirical prediction, therefore, is that eigenvalues corresponding to the correct task-defined stimulus  
215 dimension will increase with learning, while eigenvalues representing other dimensions should decrease (see  
216 Methods for interpretation of other eigenvectors shown in Figure 4c). While no study has analyzed data in  
217 this framework, we know that the first and third eigenvalue must initially be increasing during task learning  
218 simply because task-dependent correlations can by definition only emerge over the course of learning. At the  
219 same time, the third eigenvalue should decrease again at some point since it represents uncertainty over the  
220 correct task context, which is presumably decreasing with learning. Furthermore, a previous study reported  
221 a decrease in average noise correlations due to learning (Gu et al., 2011). In our analysis, this corresponds  
222 to a decrease in the 2nd eigenvalue, which happens to correspond to average noise correlations since the  
223 associated eigenvector is approximately constant (see Methods).

224 Much research has gone into inferring latent variables that contribute to the responses of neural responses  
225 (Cunningham and Yu, 2014; Archer et al., 2014; Kobak et al., 2016). Our predictions in the context of  
226 the probabilistic inference framework suggest that at least some of these latent variables can usefully be  
227 characterized as internal beliefs. Importantly, our framework suggests that the coefficients with which each  
228 latent variable influences each of the recorded sensory neurons can be interpreted in the stimulus space using  
229 knowledge of the stimulus-dependence of each neuron's tuning function (Figure 4c).

## 230 Discussion

231 In sum, we have derived task-specific, neurophysiologically testable, predictions from the mathematical  
232 framework of probabilistic inference (reviewed in (Ma and Jazayeri, 2014; Pouget et al., 2013; Fiser et al.,  
233 2010; Knill and Pouget, 2004; Kersten et al., 2004)). Our assumption that sensory neurons represent posterior  
234 beliefs, not likelihoods, means that sensory responses do not just represent information about the external  
235 stimulus but also include information about the brain's expectations about this stimulus. By treating task-  
236 training as an experimenter-controlled perturbation of the brain's expectations (part of the internal model),

237 we have derived predictions for how neural responses should change as a result of this perturbation. This  
238 approach has allowed us to sidestep two major challenges: that the brain’s full internal model is currently  
239 unknown, and that there is currently no consensus on how neural responses represent probabilities(Pouget  
240 et al., 2013; Fiser et al., 2010). While the presented theoretical predictions are novel, they are in agreement  
241 with a range of previously published empirical findings(Cohen and Newsome, 2008; Law and Gold, 2008; Gu  
242 et al., 2011; Rabinowitz et al., 2015; Bondy and Cumming, 2013).

243 The nature of our predictions directly addresses several debates in the field. First, they provide a  
244 rationale for the apparent ‘contamination’ of sensory responses by top-down decision signals(Nienborg and  
245 Cumming, 2009; Wimmer et al., 2015; Ecker et al., 2016; Rabinowitz et al., 2015). In the context of our  
246 framework, top-down signals allow sensory responses to incorporate stimulus information from earlier in the  
247 trial, not reflecting the decision per se but integrating information about the outside world(Nienborg and  
248 Cumming, 2014). Second, this dynamic feedback of feedforward stimulus information from earlier in the trial  
249 induces choice probabilities that are the result of both feedforward and feedback components (Nienborg and  
250 Cumming, 2009, 2014; Haefner et al., 2016). Third, the same process introduces correlated sensory variability  
251 that appears to be information-limiting(Moreno-Bote et al., 2014) but is not. Whether  $f'f'$ -covariability  
252 increases or decreases information depends on its source: if the latent variable driving it contains information  
253 about the stimulus, as in our case, it adds information; if it is due to noise (Kanitscheider et al., 2015), then  
254 it reduces it. Furthermore, the assumption that sensory responses represent posterior beliefs formalizes  
255 previous ideas and agrees with empirical findings about the top-down influence of experience and beliefs  
256 on sensory responses(von der Heydt et al., 1984; Lee and Mumford, 2003; Nienborg and Cumming, 2014).  
257 In contrast, our predictions are at odds with traditional implementations of ‘predictive coding’(Rao and  
258 Ballard, 1999) which postulate that sensory responses represent a prediction error and should decrease  
259 rather than increase when bottom-up and top-down information agree. During probabilistic inference, prior  
260 and likelihood ‘reinforce’ each other, which can lead to either an increase or decrease in activity.

261 It seems plausible that only a subset of sensory neurons actually represent the output of the hypothe-  
262 sized probabilistic computations (posterior), while others represent information about necessary ‘ingredients’  
263 (likelihood, prior), or carry out other auxiliary functions. Since our work also shows how to generate task-  
264 dependent predictions for those ingredients, it can serve as a tool for a hypothesis-driven exploration of the  
265 functional and anatomical diversity of sensory neurons.

266 Finally, we have shown how aspects of the low-dimensional structure in the observed covariability can  
267 be interpreted as internal beliefs that vary on a trial-by-trial basis. These variable beliefs represent the  
268 main sensory hypotheses entertained by the internal model when interpreting the sensory inputs. The detail  
269 with which these hypotheses can be recovered from neurophysiological recordings is primarily limited by

270 experimental techniques. Much current research is aimed developing those techniques and at extracting the  
271 latent structure in the resulting recordings. Our work suggests a way to interpret this structure, and makes  
272 predictions about how it should change with learning and attention.

## 273 Methods

### 274 Predictions

275 The central assumption needed to derive our predictions is that sensory responses represent posterior beliefs  
276 ('posterior coding'), such that  $p(\mathbf{r})$ , the response distribution of sensory neurons under consideration, is a  
277 function of the brain's posterior over the variables,  $\mathbf{x}$ , that those neurons represent:  $p(\mathbf{r}) = \mathcal{R}[p(\mathbf{x})]$  (Figure  
278 S1). Here, try to make as little assumptions about the nature of  $\mathcal{R}$  staying compatible with previous proposals  
279 from sampling-based to parametric (Hoyer and Hyvärinen, 2003; Ma et al., 2006; Fiser et al., 2010; Buesing  
280 et al., 2011; Savin and Denève, 2014; Tajima et al., 2016; ?). From trial to trial, the brain's approximation  
281 to the posterior  $p(\mathbf{x}) \equiv p(\mathbf{x}|\mathbf{E}) \propto \int p(\mathbf{E}|\mathbf{x})p(\mathbf{x}|\mathbf{I})p(\mathbf{I})d\mathbf{I}$  will vary since each of the terms under the integral  
282 varies due to noise and erroneously assumed serial dependencies between the trials.

283 We define the tuning function of neuron  $i$  as the neuron's mean response across many trials within  
284 a specific task context, corresponding to taking the integral above across all trials as  $\mathbf{E}$  is changed with  
285  $s$ :  $f_i(s) \equiv \langle \mathcal{R}_i[p(\mathbf{x}|\mathbf{E}(s))] \rangle$ . If the subject has completely learnt the task, their prior will correspond to  
286 the average likelihood in the task,  $\int p(\mathbf{x}|\mathbf{I})p(\mathbf{I})d\mathbf{I} = \int p(\mathbf{E}(s)|\mathbf{x})p(s)ds$  (Berkes et al., 2011), concentrating  
287 its probability mass along the same  $\mathbf{x}(s)$  line as defined by the external inputs  $\mathbf{E}(s)$ . As a result, prior  
288 expectations about the upcoming stimulus  $s$ , encoded by  $\mathbf{I}$ , shift the posterior over  $\mathbf{x}$  in the same way that  
289 changes in the externally presented  $\mathbf{E}(s)$  do. For sufficiently small deviations, the implied changes in neural  
290 responses can be approximated linearly as  $r_i = f_i(0) + f'_i(0)s_{\mathbf{I}} + \nu_i$  where  $f'_i \equiv df_i/ds$  is the derivative of  
291 the tuning curve with respect to  $s$ , and  $s_{\mathbf{I}}$  denotes the difference between the internal estimate of  $s$  and  
292 the externally presented  $s$  due to prior expectations about it. (For specific example illustrations see Figure  
293 S2 and S3.)  $\boldsymbol{\nu} \equiv (\nu_1, \dots, \nu_n)$  represents task-independent response variability due to feedforward or intrinsic  
294 sources with covariance structure  $\mathbf{C}^0$ . Hence, trial-by-trial variability in the brain's expectations about  $s$ ,  
295 and hence, in  $s_{\mathbf{I}}$ , implies that response covariability is given by  $\text{cov}(r_i, r_j) = C_{ij}^0 + f'_i f'_j \text{vars}_{\mathbf{I}}$ . Our prediction  
296 concerns the last term in this equation and can be tested by comparing empirical covariances in two different  
297 tasks (e.g. (Cohen and Newsome, 2008)) or by inferring common variability (e.g. (Rabinowitz et al., 2015)).

## 298 **Inferring internal model**

299 For the simple tasks considered above, complete learning implies top-down variability in only 1 direction.  
300 However, more complex tasks (e.g. those switching between different contexts), or incomplete learning (e.g.  
301 uncertainty about fixed task parameters), will generally induce variability along multiple dimensions. Making  
302 the assumption that neural responses to a fixed stimulus are locally well-approximated by a correlated Gaus-  
303 sian distribution, we can write the covariance between two neurons as:  $\text{cov}(r_i, r_j) = C_{ij}^0 + \sum_{k=1}^n \lambda^{(k)} e_i^{(k)} e_j^{(k)}$ .  
304 Each eigenvector,  $\mathbf{e} = (e_1, \dots, e_n)$ , corresponds to the change in the population response in a particular di-  
305 rection which, by way of the tuning functions,  $f_i(s)$ , can be interpreted in stimulus space (e.g. change in  
306 orientation or, or increase in contrast of a particular pattern). The eigenvalues,  $\lambda^{(k)}$ , quantify the magnitude  
307 of the associated trial-to-trial variability which is shared between all neurons with non-zero entries in  $\mathbf{e}^{(k)}$ .

308 The model in our proof-of-concept simulations has been described previously (Haefner et al., 2016). In  
309 brief, it performs inference by neural sampling in a linear sparse-coding model of primary visual cortex  
310 (Olshausen and Field, 1996; Hoyer and Hyvärinen, 2003; Fiser et al., 2010). The prior is derived from an  
311 orientation discrimination task with 2 contexts – oblique orientations, and cardinal orientations – that is  
312 modeled on an analog direction discrimination task (Cohen and Newsome, 2008). The responses of 1024  
313 neurons in the lower level whose receptive fields uniformly tiled the orientation space. Each neuron’s response  
314 corresponds to a sample from the posterior distribution over the variable that it represents in accordance  
315 with the neural sampling hypothesis (Hoyer and Hyvärinen, 2003; Fiser et al., 2010). We simulated zero-  
316 signal trials by presenting uniform gray images to the model. The elements of the eigenvector corresponding  
317 to the 2nd largest eigenvalue are all approximately the same indicating that variability corresponding to  
318 the associated latent variable adds response variability that does not depend on the neurons’ orientations.  
319 Since the recovered eigenvectors are orthogonal to each other, the eigenvalue corresponding to a constant  
320 eigenvector determines the average correlations in the population. The eigenvectors not described in the  
321 main text correspond to stimulus-driven covariability, the eigenvectors of which are plotted in Figure S4 for  
322 comparison.

## 323 **References**

- 324 Archer, E. W., Koster, U., Pillow, J. W. and Macke, J. H. (2014). Low-dimensional models of neural  
325 population activity in sensory cortical circuits. *Advances in Neural Information Processing Systems* 27,  
326 343–351.
- 327 Berkes, P., Orban, G., Lengyel, M. and Fiser, J. (2011). Spontaneous Cortical Activity Reveals Hallmarks

- 328 of an Optimal Internal Model of the Environment. *Science* *331*, 83–87.
- 329 Bondy, A. and Cumming, B. (2013). Top down signals influence the distribution of noise correlations amongst  
330 sensory neurons. In SfN Meeting Planner (Society for Neuroscience).
- 331 Bornschein, J., Henniges, M. and Lücke, J. (2013). Are V1 simple cells optimized for visual occlusions? A  
332 comparative study. *PLoS computational biology* *9*, e1003062.
- 333 Britten, K. H., Newsome, W. T., Shadlen, M. N., Celebrini, S. and Movshon, J. A. (1996). A relationship  
334 between behavioral choice and the visual responses of neurons in macaque MT. *Vis Neurosci* *13*, 87–100.
- 335 Buesing, L., Bill, J., Nessler, B. and Maass, W. (2011). Neural dynamics as sampling: a model for stochastic  
336 computation in recurrent networks of spiking neurons. *PLoS computational biology* *7*, e1002211.
- 337 Cohen, M. R. and Newsome, W. T. (2008). Context-dependent changes in functional circuitry in visual area  
338 MT. *Neuron* *60*, 162–73.
- 339 Cohen, M. R. and Newsome, W. T. (2009). Estimates of the contribution of single neurons to perception  
340 depend on timescale and noise correlation. *The Journal of Neuroscience* *29*, 6635–48.
- 341 Cunningham, J. P. and Yu, B. M. (2014). Dimensionality reduction for large-scale neural recordings. *Nature*  
342 *Neuroscience* *17*.
- 343 Ecker, A. S., Denfield, G. H., Bethge, M. and Tolias, A. S. (2016). On the structure of population activity  
344 under fluctuations in attentional state. *The Journal of Neuroscience* *36*, 1775–1789.
- 345 Fischer, J. and Whitney, D. (2014). Serial dependence in visual perception. *Nature Neuroscience* *17*,  
346 738–743.
- 347 Fiser, J., Berkes, P., Orbán, G. and Lengyel, M. (2010). Statistically optimal perception and learning: from  
348 behavior to neural representations. *Trends in cognitive sciences* *14*, 119–30.
- 349 Gershman, S. J. and Beck, J. M. (2016). Complex Probabilistic Inference: From Cognition to Neural  
350 Computation. In *Computational Models of Brain and Behavior*, (Moustafa, A., ed.), chapter Complex Pr,  
351 pp. 1–17. Wiley-Blackwell.
- 352 Gu, Y., Liu, S., Fetsch, C. R., Yang, Y., Fok, S., Sunkara, A., DeAngelis, G. C. and Angelaki, D. E. (2011).  
353 Perceptual learning reduces interneuronal correlations in macaque visual cortex. *Neuron* *71*, 750–761.
- 354 Haefner, R. M., Berkes, P. and Fiser, J. (2016). Perceptual Decision-Making as Probabilistic Inference by  
355 Neural Sampling. *Neuron* *90*, 649–660.

- 356 Haefner, R. M., Gerwinn, S., Macke, J. H. and Bethge, M. (2013). Inferring decoding strategies from choice  
357 probabilities in the presence of correlated variability. *Nature Neuroscience* *16*, 235–242.
- 358 Hoyer, P. O. and Hyvärinen, A. (2003). Interpreting neural response variability as monte carlo sampling of  
359 the posterior. *Advances in neural information processing systems* *17*, 293–300.
- 360 Kanitscheider, I., Coen-Cagli, R. and Pouget, A. (2015). Origin of information-limiting noise correlations.  
361 *Proceedings of the National Academy of Sciences* *112*, E6973–82.
- 362 Kersten, D., Mamassian, P. and Yuille, A. (2004). Object perception as Bayesian inference. *Annual review*  
363 *of psychology* *55*, 271–304.
- 364 Knill, D. C. and Pouget, A. (2004). The Bayesian brain: the role of uncertainty in neural coding and  
365 computation. *Trends in Neurosciences* *27*, 712–9.
- 366 Kobak, D., Brendel, W., Constantinidis, C., Feierstein, C. E., Kepecs, A., Mainen, Z. F., Qi, X. L., Romo,  
367 R., Uchida, N. and Machens, C. K. (2016). Demixed principal component analysis of neural population  
368 data. *eLife* *5*, 1–36.
- 369 Law, C.-T. and Gold, J. I. (2008). Neural correlates of perceptual learning in a sensory-motor, but not a  
370 sensory, cortical area. *Nature Neuroscience* *11*, 505–513.
- 371 Lee, T. S. and Mumford, D. (2003). Hierarchical Bayesian inference in the visual cortex. *Journal of the*  
372 *Optical Society of America. A, Optics, image science, and vision* *20*, 1434–48.
- 373 Ma, W. J., Beck, J. M., Latham, P. E. and Pouget, A. (2006). Bayesian inference with probabilistic population  
374 codes. *Nature Neuroscience* *9*, 1432–8.
- 375 Ma, W. J. and Jazayeri, M. (2014). Neural Coding of Uncertainty and Probability. *Annual review of*  
376 *neuroscience* *37*, 205–220.
- 377 Moreno-Bote, R., Beck, J., Kanitscheider, I., Pitkow, X., Latham, P. and Pouget, A. (2014). Information-  
378 limiting correlations. *Nat Neurosci* *17*, 1410–1417.
- 379 Nienborg, H., Cohen, M. and Cumming, B. G. (2012). Decision-Related Activity in Sensory Neurons:  
380 Correlations Among Neurons and with Behavior. *Annual Review of Neuroscience* *35*, 463–483.
- 381 Nienborg, H. and Cumming, B. G. (2009). Decision-related activity in sensory neurons reflects more than a  
382 neuron’s causal effect. *Nature* *459*, 89–92.



- 383 Nienborg, H. and Cumming, B. G. (2014). Decision-Related Activity in Sensory Neurons May Depend on  
384 the Columnar Architecture of Cerebral Cortex. *Journal of Neuroscience* *34*, 3579–3585.
- 385 Olshausen, B. A. and Field, D. J. (1996). Emergence of simple-cell receptive field properties by learning a  
386 sparse code for natural images. *Nature* *381*, 607–609.
- 387 Olshausen, B. A. and Field, D. J. (2004). Sparse coding of sensory inputs. *Current Opinion in Neurobiology*  
388 *14*, 481–487.
- 389 Pouget, A., Beck, J. M., Ma, W. J. and Latham, P. E. (2013). Probabilistic brains: knowns and unknowns.  
390 *Nature Reviews Neuroscience* *16*, 1170–1178.
- 391 Rabinowitz, N. C., Goris, R. L., Cohen, M. and Simoncelli, E. P. (2015). Attention stabilizes the shared  
392 gain of V4 populations. *eLife* *4*.
- 393 Rao, R. P. and Ballard, D. H. (1999). Predictive coding in the visual cortex: a functional interpretation of  
394 some extra-classical receptive-field effects. *Nature neuroscience* *2*, 79–87.
- 395 Sasaki, R. and Uka, T. (2009). Dynamic Readout of Behaviorally Relevant Signals from Area MT during  
396 Task Switching. *Neuron* *62*, 147–157.
- 397 Savin, C. and Denève, S. (2014). Spatio-temporal representations of uncertainty in spiking neural networks.  
398 *Advances in Neural Information Processing Systems* *27*, 1–9.
- 399 Schwartz, O. and Simoncelli, E. P. (2001). Natural signal statistics and sensory gain control. *Nature*  
400 *neuroscience* *4*, 819–825.
- 401 Tajima, C. I., Tajima, S., Koida, K., Komatsu, H., Aihara, K. and Suzuki, H. (2016). Population code  
402 dynamics in categorical perception. *Nature Scientific Reports* *5*, 1–13.
- 403 von der Heydt, R., Peterhans, E. and Baumgartner, G. (1984). Illusory Contours and Cortical Neuron  
404 Responses. *Science* *224*, 1260–2.
- 405 von Helmholtz, H. (1867). *Handbuch der physiologischen Optik*. Verlag von Leopold Voss.
- 406 Wimmer, K., Compte, A., Roxin, A., Peixoto, D., Renart, A. and Rocha, J. D. (2015). The dynamics of  
407 sensory integration in a hierarchical network explains choice probabilities in MT. *Nature Communications*  
408 *6*, 1–13.
- 409 Yuille, A. and Kersten, D. (2006). Vision as Bayesian inference: analysis by synthesis? *Trends in cognitive*  
410 *sciences* *10*, 301–8.

411 **Supplemental Figures**

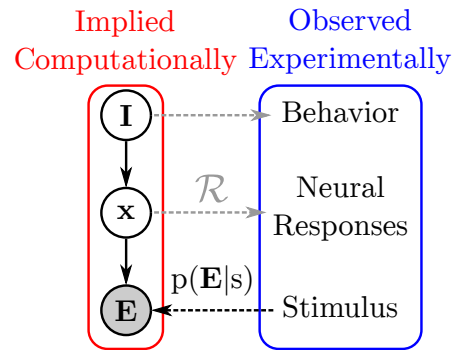

Figure S1: Schematic of posterior coding for an early sensory area that shows tuning to a stimulus parameter  $s$ . The experimenter defines  $p(\mathbf{E}|s)$  (e.g. additive noise in an image), and the brain infers  $p(\mathbf{x}|\mathbf{E}, \mathbf{I})$  for early sensory variables  $\mathbf{x}$ . Neurons representing this distribution through some encoding  $\mathcal{R}$  will show ‘tuning’ to  $s$  by way of the posterior over  $\mathbf{x}$  changing as  $s$  is changed. Our primary goal is not to infer a model relating stimulus, neural responses and behavior, but to infer the computations performed by the brain.

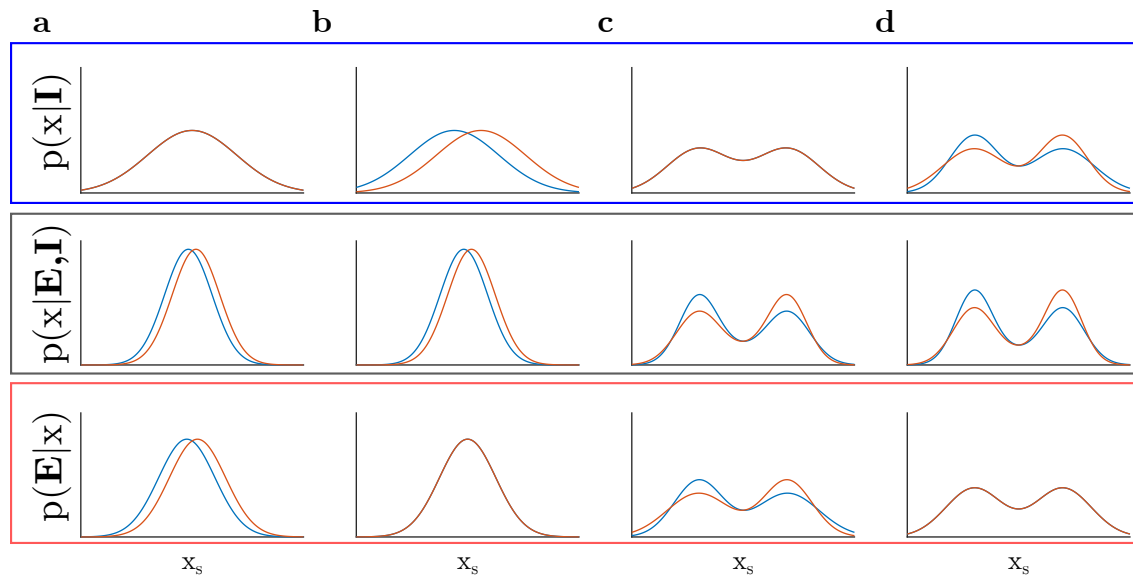

Figure S2: Equivalence of posterior for coarse and fine discrimination models. Fine discrimination (a-b) is modeled with a unimodal prior at the  $s = 0$  boundary and a unimodal likelihood that shifts along  $x_s$ . 2AFC coarse discrimination (i.e. categorical decisions) (c-d) is modeled as a bimodal prior symmetric around  $s = 0$  with bimodal likelihoods, where both prior expectations and evidence are modeled as a sharpening of one of the category modes. **(a)** feedforward (informative likelihood) case for fine discrimination. **(b)** feedback (informative prior) case for fine discrimination. Note equivalence of posterior with (a). **(c)** feedforward (informative likelihood) case for coarse discrimination. **(d)** feedback (informative prior) case for coarse discrimination. Note equivalence of posterior with (c).

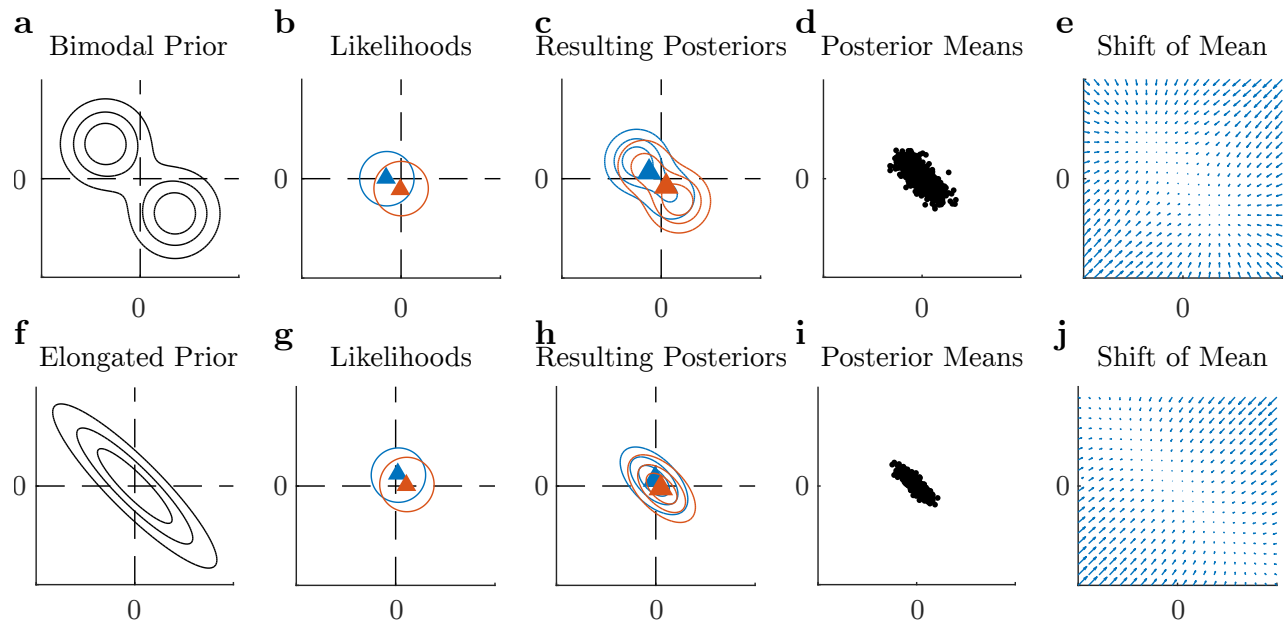

Figure S3: 2D illustration of the effect of an elongated/bimodal prior on the mean of the posterior. **a**: a bimodal prior, modeling the subject’s expectations about the stimulus in  $\mathbf{x}$ -space during a coarse-discrimination task. **b**: on ‘zero signal’ trials, the stimulus is drawn from a distribution around  $\mathbf{x}(s = 0)$ , yielding likelihood functions that are shifted in  $\mathbf{x}$ -space uniformly around  $\mathbf{x} = \mathbf{0}$ , shown here for two example trials. **c**: the resulting posteriors for each of these trial-by-trial likelihoods are themselves bimodal. **d**: the means of these posteriors (triangles in **c**, dots here) tend to lie along the higher-probability region between the prior modes, despite an isotropic distribution of likelihood means. **e**: displacement of the mean of the likelihood to the mean of the posterior under the prior in **a**. Thus, even in the absence of serial dependencies, ‘uniform’ trial-to-trial variability in the stimulus yields variability in the posterior means primarily along the axis with the most mass in the prior. **f-j** same as a-e but for a unimodal but elongated prior, as might be expected in a fine discrimination task.

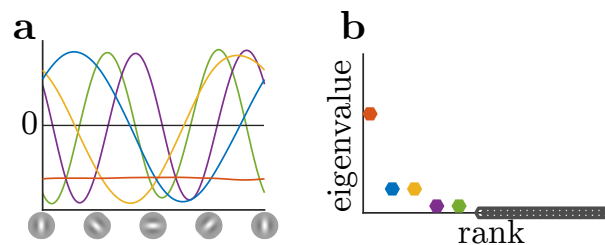

Figure S4: Principal components of model neurons due to only stimulus-driven correlations. Note that the sinusoidal eigenvectors at the same frequency have indistinguishable eigenvalues and hence form quadrature pairs, implying circular symmetry with respect to neurons’ tuning. There is no more variance along the vertical-horizontal preferred orientation axis than then oblique axis.
